# Supplementary material for: Whole-brain functional ultrasound imaging in awake head-fixed mice
Source: Springer Nature journal article supplement (doi:10.1038/s41596-021-00548-8), 2021-06-04
Supplement: MOESM1 [file 41596_2021_548_MOESM1_ESM16.xlsx]

## Sheet: Feuil1
Supplementary Table 1. List of the 242 brain regions/hemisphere adapted from the Allen Mouse Common Coordinate Framework and organized by main anatomical structures.
Region Number	Region Abbreviation	Brain regions	Name of the region
Cerebrum (CB) - Cortical Plate
1	ACAd	ACAd	Anterior cingulate area, dorsal part
2	ACAv	ACAv	Anterior cingulate area, ventral part
3	AUDd	AUDd	Dorsal auditory area
4	AUDp	AUDp	Primary auditory area
5	AUDpo	AUDpo	Posterior auditory area
6	AUDv	AUDv	Ventral auditory area
7	MOp	MOp	Primary motor area
8	MOs	MOs	Secondary motor area
9	RSPagl	RSPagl	Restrosplenial area, lateral agranular part
10	RSPd	RSPd	Retrosplenial area, dorsal part
11	RSPv	RSPv	Retrosplenial area, ventral part
12	SSp-bf	SSp-bf	Primary somatosensory area, barrel field
13	SSp-ll	SSp-ll	Primary somatosensory area, lower limb
14	SSp-n	SSp-n	Primary somatosensory area, nose
15	SSp-tr	SSp-tr	Primary somatosensory area, trunk
16	SSp-ul	SSp-ul	Primary somatosensory area, upper limb
17	SSp-un	SSp-un	Primary somatosensory area, unassigned
18	SSs	SSs	Supplemental somatosensory area
19	TEa	TEa	Temporal association areas
20	VISC	VISC	Visceral area
21	AI	ALp, Alv, Ald	Agranular insular area, posterior, ventral and dorsal parts
22	VISli	VISli	Laterointermediate visual area
23	VISa	VISa	Anterior visual area
24	VISal	VISal	Anterolateral visual area
25	VISam	VISam	Anteromedial visual area
26	VISl	VISl	Lateral visual area
27	VISp(pl)	VISp(pl)	Primary visual area, posterior lateral
28	VISp(al)	VISp(al)	Primary visual area, anteior lateral
29	VISp(am)	VISp(am)	Primary visual area, anterior medial
30	VISp(pm)	VISp(pm)	Primary visual area, posterior medial
31	VISpm	VISpm	Posteromedial visual area
32	VISrl	VISrl	Rostrolateral visual area
33	VISpl	VISpl	Posterolateral visual area
34	VISpor	VISpor	Postrhinal area
35	PERI	PERI	Perirhinal area
36	ECT	ECT	Ectorhinal area
37	COAa	COAa	Cortical amygdalar area, anterior part
38	COApl	COApl	Cortical amygdalar area, posterior part, lateral zone
39	COApm	COApm	Cortical amygdalar area, posterior part, medial zone
40	NLOT	NLOT1, NLOT2, NLOT3	Nucleus of the lateral olfactory tract, layers 1, 2 and 3
41	PIR	PIR	Piriform area
42	TR	TR	Postpiriform transition area
43	PAA	PAA	Piriform-amygdalar area
Cerebrum (CB) - Cortical Subplate
44	PA	PA	Posterior amygdalar nucleus
45	LA	LA	Lateral amygdalar nucleus
46	BLAa	BLAa	Basolateral amygdalar nucleus, anterior part
47	BLAp	BLAp	Basolateral amygdalar nucleus, posterior part
48	BLAv	BLAv	Basolateral amygdalar nucleus, ventral part
49	BMAa	BMAa	Basomedial amygdalar nucleus, anterior part
50	BMAp	BMAp	Basomedial amygdalar nucleus, posterior part
51	EPd	EPd	Endopiriform nucleus, dorsal part
52	EPv	EPv	Endopiriform nucleus, ventral part
53	CLA	CLA	Claustrum
Hippocampal Formation (HPF)
54	APr	APr	Area prostriata
55	HATA	HATA	Hippocampo-amygdalar transition area
56	CA1d	CA1d	CA1 subfield, dorsal part
57	CA1i	CA1i	CA1 subfield, intermediate
58	CA1v	CA1v	CA1 subfield, ventral
59	CA2d	CA2d	CA2 subfield, dorsal part
60	CA2i	CA2i	CA2 subfield, intermediate
61	CA2v	CA2v	CA2 subfield, ventral
62	CA3d	CA3d	CA3 subfield, dorsal part
63	CA3i	CA3i	CA3 subfield, intermediate
64	CA3v	CA3v	CA3 subfield, ventral
65	DGd	DGd	Dentate gyrus, dorsal part
66	DGi	DGi	Dentate gyrus, intermediate
67	DGv	DGv	Dentate gyrus, ventral
68	FC	FC	Fasciola cinerea
69	IG	IG	Induseum griseum
70	ENTl	ENTl	Entorhinal area, lateral part
71	ENTm	ENTm	Entorhinal area, medial part
72	PAR	PAR	Parasubiculum
73	POST	POST	Postsubiculum
74	PRE	PRE	Presubiculum
75	ProS	ProS	Prosubiculum
76	SUB	SUB	Subiculum
Striatum (STR)
77	MEA	MEA	Medial amygdalar nucleus
78	IA	IA	Intercalated amygdalar nucleus
79	AAA	AAA	Anterior amygdalar area
80	CEAc	CEAc	Central amygdalar nucleus, capsular part
81	CEAl	CEAl	Central amygdalar nucleus, lateral part
82	CEAm	CEAm	Central amygdalar nucleus, medial part
83	CPcdl	CPcdl	Caudoputamen, caudal dorsal lateral
84	CPcdm	CPcdm	Caudoputamen, caudal dorsal medial
85	CPcml	CPcml	Caudoputamen, caudal medial lateral
86	CPcmm	CPcmm	Caudoputamen, caudal medial medial
87	CPcv	CPcv	Caudoputamen, caudal ventral
88	CPmdc	CPmdc	Caudoputamen, medial dorsal central
89	CPmdl	CPmdl	Caudoputamen, medial dorsal lateral
90	CPmdm	CPmdm	Caudoputamen, medial dorsal medial
91	CPmmc	CPmmc	Caudoputamen, medial medial central
92	CPmml	CPmml	Caudoputamen, medial medial lateral
93	CPmvc	CPmvc	Caudoputamen, medial ventral central
94	CPmvl	CPmvl	Caudoputamen, medial ventral lateral
95	LS	LSv, LSc, LSr	Lateral septal nucleus, ventral, caudal and rostroventral parts
96	BA	BA	Bed nucleus of the accessory olfactory tract
97	SF	SF	Septofimbrial nucleus
98	GPe	GPe	Globus pallidus, external segment
99	GPi	GPi	Globus pallidus, internal segment
100	SI	SI	Substantia innominata
101	TRS	TRS	Triangular nucleus of septum
Thalamus (TH)
102	AD	AD	Anterodorsal nucleus
103	AM	AMd, AMv	Anteromedial nucleus, dorsal and ventral parts
104	AV	AV	Anteroventral nucleus of thalamus
105	IAD	IAD	Interanterodorsal nucleus of the thalamus
106	IAM	IAM	Interanteromedial nucleus of the thalamus
107	LD	LD	Lateral dorsal nucleus of thalamus
108	EPI	LH, MH	Lateral and Medial habenula
109	IGL	IGL	Intergeniculate leaflet of the lateral geniculate complex
110	LGv	LGv	Ventral part of the lateral geniculate complex
111	IntG	IntG	Intermediate geniculate nucleus
112	SubG	SubG	Subgeniculate nucleus
113	CL	CL	Central lateral nucleus of the thalamus
114	CM	CM	Central medial nucleus of the thalamus
115	PCN	PCN	Paracentral nucleus
116	PF	PF	Parafascicular nucleus
117	PIL	PIL	Posterior intralaminar thalamic nucleus
118	RH	RH	Rhomboid nucleus
119	Eth	Eth	Ethmoid nucleus of the thalamus
120	PO	PO	Posterior complex of the thalamus
121	LP	LP	Lateral posterior nucleus of the thalamus
122	SGN	SGN	Suprageniculate nucleus
123	POL	POL	Posterior limiting nucleus of the thalamus
124	IMD	IMD	Intermediodorsal nucleus of the thalamus
125	MD	MD	Mediodorsal nucleus of thalamus
126	PR	PR	Perireunensis nucleus
127	SMT	SMT	Submedial nucleus of the thalamus
128	RE	RE	Nucleus of reuniens
129	PT	PT	Parataenial nucleus
130	PVT	PVT	Paraventricular nucleus of the thalamus
131	Xi	Xi	Xiphoid thalamic nucleus
132	RT	RT	Reticular nucleus of the thalamus
133	LGd	LGd-co, LGd-ip, LGd-sh	Dorsal part of the lateral geniculate complex, core, ipsilateral and shell
134	MG	MGm, MGv	Medial geniculate complex, medial and ventral parts
135	PP	PP	Peripeduncular nucleus
136	SPA	SPA	Subparafascicular area
137	SPF	SPFm, SPFp	Subparafascicular nucleus, magnocellular and parvicellular parts
138	PoT	PoT	Posterior triangular thalamic nucleus
139	VAL	VAL	Ventral anterior-lateral complex of the thalamus
140	VM	VM	Ventral medial nucleus of the thalamus
141	VP	VPL, VPLpc, VPM, VPMpc	Ventral posteromedial and posterolateral nuclei of the thalamus
Hypothalamus (HY)
142	LZ	LHA, ZI, PST, PSTN, STN, TU, PeF, RCH, LPO	Hypothalamic lateral zone
143	ME	ME	Median eminence
144	MEZ	AHN, LM, Mmm, Mmd, Mml, Mmme, Mmp, SUM, TMd, TMv, PMd, PH, PMv, VMH, PVHd, MPN	Hypothalamic medial zone
145	PVR	ADP, AVPV, AVP, DMH, MPO, MEPO, PS, PVp, Pvpo, Pva, Pvi, SFO, PD, SBPV, SCH, OV, VLPO, VMPO	Periventricular region
146	PVZ	ASO, ARH, PVH, Pva, Pvi, SO	Periventricular zone
Midbrain (MB)
147	CLI	CLI	Central linear nucleus raphe
148	DR	DR	Dorsal nucleus raphe
149	IF	IF	Interfascicular nucleus raphe
150	IPN	IPC, IPD, IPL, IPR	Interpeduncular nucleus
151	RL	RL	Rostral linear nucleus raphe
152	PPN	PPN	Pedunculopontine nucleus
153	SNc	SNc	Substantia nigra, compact part
154	AT	AT	Anterior tegmental nucleus
155	CUN	CUN	Cuneiform nucleus
156	DT	DT	Dorsal terminal nucleus of the accessory optic tract
157	EW/MA3	EW, MA3	Medial accessory oculomotor and Edinger-Westphal nucleus
158	LT	LT	Lateral terminal nucleus of the accessory optic tract
159	MT	MT	Medial terminal nucleus of the accessory optic tract
160	MRN	MRNal, MRNam, MRNpl, MRNpm	Midbrain reticular nucleus, anterior lateral, anterior medial, posterior lateral and posterior medial parts
161	RR	RR	Midbrain reticular nucleus, retrorubral area
162	III	III	Oculomotor nucleus
163	PN	PN	Paranigral nucleus
164	Pa4/IV	Pa4, IV	Trochlear and paratrochlear nuclei
165	PAG	PAGa, PAGmd, PAGml, PAGmv, PAGpd, PAGpl, PAGpv, PRC, ND, INC, Su3	Periaqueductal gray area
166	PRT	APN, MPT, NOT, NPC, OP, PPT, RPF	Pretectal region
167	RN	RN	Red nucleus
168	SNr	SNr	Substantia nigra, reticular part
169	SCd(a)	SCd(a)	Superior colliculus, deep layers, anterior
170	SCd(p)	SCd(p)	Superior colliculus, deep layers, posterior
171	SCi(al)	SCi(al)	Superior colliculus, intermediate layers, anterior lateral
172	SCi(am)	SCi(am)	Superior colliculus, intermediate layers, anterior medial
173	SCi(pl)	SCi(pl)	Superior colliculus, intermediate layers, posterior lateral
174	SCs(al)	SCs(al)	Superior colliculus, superficial layers, anterior lateral
175	SCs(am)	SCs(am)	Superior colliculus, superficial layers, anterior medial
176	SCs(pl)	SCs(pl)	Superior colliculus, superficial layers, posterolateral
177	SCs(pm)	SCs(pm)	Superior colliculus, superficial layers, posterior medial
178	VTA	VTA	Ventral tegmental area
179	VTN	VTN	Ventral tegmental nucleus
180	ICc	ICc	Inferior colliculus, central nucleus
181	ICd	ICd	Inferior colliculus, dorsal nucleus
182	ICe	ICe	Inferior colliculus, external nucleus
183	MEV	MEV	Midbrain trigeminal nucleus
184	NB	NB	Nucleus of the brachium of the inferior colliculus
185	SAG	SAG	Nucleus sagulum
186	PBG	PBG	Parabigeminal nucleus
187	SCO	SCO	Subcommissural organ
Hindbrain (HB)
188	CN	DCO, VCO	Cochlear nuclei
189	GRN	GRN	Gigantocellular reticular nucleus
190	IRN	IRN	Intermediate reticular nucleus
191	MARN	MARN	Magnocellular reticular nucleus
192	VNC	LAV, MV, SPIV, SUV	Vestibular nuclei
193	NTS	NTS	Nucleus of the solitary tract
194	NTB	NTB	Nucleus of the trapezoid body
195	SPVO	SPVO	Spinal nucleus of the trigeminal, oral part
196	VI	VI	Abducens nucleus
197	VII	VII	Facial motor nucleus
198	PARN	PARN	Parvicellular reticular nucleus
199	x	x	Nucleus x
200	y	y	Nucleus y
201	PGRN	PGRNd, PGRNl	Paragigantocellular reticular nucleus, dorsal and lateral parts
202	PPY	PPY	Parapyramidal nucleus
203	PHY	NR, PRP	Perihypoglossal nuclei
204	NRaphe	RM, RO, RPA	Nucleus Raphe Magnus, Obscurus and Pallidus
205	ICB	ICB	Infracerebellar nucleus
206	ACVII	ACVII	Accessory facial motor nucleus
207	LDT	LDT	Laterodorsal tegmental nucleus
208	LC	LC	Locus ceruleus
209	NI	NI	Nucleus incertus
210	RPO	RPO	Nucleus raphe pontis
211	B	B	Barrington's nucleus
212	DTN/PDTg	DTN, PDTg	Dorsal and posterodorsal tegmental nucleus
213	I5/PC5	I5, PC5	Intertrigeminal and Parvicellular motor 5 nucleus
214	P5/Acs5	P5, Acs5	Peritrigeminal and accessory trigeminal nucleus
215	V	V	Motor nucleus of trigeminal
216	PB	PB	Parabrachial nucleus
217	NLL	NLL	Nucleus of the lateral lemniscus
218	PCG	PCG	Pontine central gray
219	PG	PG	Pontine gray
220	SG	SG	Supragenual nucleus
221	SUT	SUT	Supratrigeminal nucleus
222	TRN	TRN	Tegmental reticular nucleus
223	SOC	POR, SOCl, SOCm	Superior olivary complex
224	PSV	PSV	Principal sensory nucleus of the trigeminal
225	PRNc	PRNc	Pontine reticular nucleus, caudal part
226	PRNr	PRNr	Pontine reticular nucleus
227	SLC/SLD	SLC, SLD	Subceruleus and sublaterodorsal nuclei
Cerebellum (CBL)
228	ANcr1	ANcr1	Crus 1
229	ANcr2	ANcr2	Crus 2
230	COPY	COPY	Copula pyramidis
231	FL	FL	Flocculus
232	PFL	PFL	Paraflocculus
233	PRM	PRM	Paramedian lobule
234	SIM	SIM	Simple lobule
235	CENT2	CENT2	Lobule II
236	CENT3	CENT3	Lobule III
237	CUL4	CUL4	Lobules IV-V
238	LING	LING	Lingula (I)
239	DN	DN	Dentate nucleus
240	FN	FN	Fastigial nucleus
241	IP	IP	Interposed nucleus
242	VeCB	VeCB	Vestibulocerebellar nucleus
